# Supplementary material for: A systematic review and meta-analysis of effectiveness and safety of therapy for overactive bladder using botulinum toxin A at different dosages
Source: PubMed Central journal article supplement (PMC5685754; doi:10.18632/oncotarget.20056), 2017-08-07
Supplement: oncotarget-08-90338-s001.pdf [file oncotarget-08-90338-s001.pdf]

# A systematic review and meta-analysis of effectiveness and safety of therapy for overactive bladder using botulinum toxin a at different dosages

## SUPPLEMENTARY MATERIALS

**Supplementary Table 1: Summary of result with different dosage at different observation point for NDO**

| Outcomes                                           | Number of RCTs | WMD/RR | 95% CI         | I <sup>2</sup> (%) | P <sub>het</sub> |
|----------------------------------------------------|----------------|--------|----------------|--------------------|------------------|
| <b>Urinary Incontinence (UI) Episodes per Week</b> |                |        |                |                    |                  |
| <b>2 weeks</b>                                     |                |        |                |                    |                  |
| BTX-A 200U VS. Placebo                             | 1              | -9.10  | -14.10, -4.10  | NA                 | NA               |
| BTX-A 300U VS. Placebo                             | 1              | -6.10  | -12.54, 0.34   | NA                 | NA               |
| BTX-A 300U VS. 200U                                | 1              | 3.00   | -3.30, 9.30    | NA                 | NA               |
| <b>6 weeks</b>                                     |                |        |                |                    |                  |
| BTX-A 200U VS. Placebo                             | 3              | -10.72 | -13.40, -8.04  | 0.0                | 0.626            |
| BTX-A 300U VS. Placebo                             | 3              | -11.42 | -13.91, -8.93  | 50                 | 0.135            |
| BTX-A 300U VS. 200U                                | 4              | -0.38  | -2.60, 1.84    | 0.0                | 0.765            |
| <b>12 weeks</b>                                    |                |        |                |                    |                  |
| BTX-A 200U VS. Placebo                             | 1              | -8.50  | -14.46, -2.54  | NA                 | NA               |
| BTX-A 300U VS. Placebo                             | 1              | -7.80  | -13.73, -1.87  | NA                 | NA               |
| BTX-A 300U VS. 200U                                | 1              | 0.70   | -4.73, 6.13    | NA                 | NA               |
| <b>Maximum Cystometric Capacity (MCC)</b>          |                |        |                |                    |                  |
| <b>6 weeks</b>                                     |                |        |                |                    |                  |
| BTX-A 200U VS. Placebo                             | 5              | 141.45 | 123.57, 159.33 | 0.0                | 0.991            |
| BTX-A 300U VS. Placebo                             | 5              | 151.52 | 132.86, 170.18 | 0.0                | 0.990            |
| BTX-A 300U VS. 200U                                | 6              | 9.23   | -11.61, 30.06  | 0.0                | 0.988            |
| <b>Volume per Void</b>                             |                |        |                |                    |                  |
| <b>2 weeks</b>                                     |                |        |                |                    |                  |
| BTX-A 200U VS. Placebo                             | 1              | 42.60  | 14.49, 70.71   | NA                 | NA               |
| BTX-A 300U VS. Placebo                             | 1              | 49.90  | 17.54, 82.26   | NA                 | NA               |
| BTX-A 300U VS. 200U                                | 1              | 7.30   | -30.28, 44.88  | NA                 | NA               |
| <b>6 weeks</b>                                     |                |        |                |                    |                  |
| BTX-A 200U VS. Placebo                             | 2              | 92.68  | 76.22, 109.14  | 0.0                | 0.982            |
| BTX-A 300U VS. Placebo                             | 2              | 100.73 | 83.24, 118.22  | 0.0                | 0.328            |
| BTX-A 300U VS. 200U                                | 3              | 4.72   | -12.12, 21.57  | 0.0                | 0.663            |
| <b>12 weeks</b>                                    |                |        |                |                    |                  |
| BTX-A 200U VS. Placebo                             | 1              | 83.70  | 54.54, 112.86  | NA                 | NA               |
| BTX-A 300U VS. Placebo                             | 1              | 78.80  | 46.23, 111.37  | NA                 | NA               |
| BTX-A 300U VS. 200U                                | 1              | -4.90  | -43.16, 33.36  | NA                 | NA               |
| <b>Maximum Detrusor Pressure (MDP)</b>             |                |        |                |                    |                  |
| <b>6 weeks</b>                                     |                |        |                |                    |                  |
| BTX-A 200U VS. Placebo                             | 5              | -33.01 | -37.75, -28.27 | 0.0                | 0.998            |
| BTX-A 300U VS. Placebo                             | 5              | -31.31 | -35.79, -26.84 | 0.0                | 0.679            |
| BTX-A 300U VS. 200U                                | 6              | 1.16   | -3.29, 5.60    | 0.0                | 0.831            |
| <b>Incontinence Quality of Life (I-QoL)</b>        |                |        |                |                    |                  |
| <b>6 weeks</b>                                     |                |        |                |                    |                  |
| BTX-A 200U VS. Placebo                             | 1              | 16.10  | 10.70, 21.50   | NA                 | NA               |
| BTX-A 300U VS. Placebo                             | 1              | 22.10  | 17.06, 27.14   | NA                 | NA               |
| BTX-A 300U VS. 200U                                | 3              | 3.66   | -0.35, 7.67    | 0.0                | 0.605            |
| <b>Total Adverse Events*</b>                       |                |        |                |                    |                  |
| BTX-A 200U VS. Placebo                             | 5              | 1.15   | 1.09, 1.21     | 0.0                | 0.988            |
| BTX-A 300U VS. Placebo                             | 5              | 1.13   | 1.07, 1.20     | 0.0                | 0.897            |
| BTX-A 300U VS. 200U                                | 6              | 0.99   | 0.94, 1.03     | 0.0                | 0.984            |

P<sub>het</sub>: Test of heterogeneity, \*: The effect size of RR was only employed at outcome of total adverse events, NA: Not available.

**Supplementary Table 2: Summary of result with different dosage at different observation point for IOAB.** See Supplementary\_Table\_2
